# Supplementary material for: Regorafenib plus Vincristine and Irinotecan in Pediatric Patients with Recurrent/Refractory Solid Tumors: An Innovative Therapy for Children with Cancer Study
Source: PubMed Central journal article supplement — Clin Cancer Res. 2023 Aug 22;29(21):4341–51. doi: 10.1158/1078-0432.CCR-23-0257 (PMC10618645; doi:10.1158/1078-0432.ccr-23-0257), 2023-08-22
Supplement: ccr-23-0257_supplementary_figure_s1_suppfs1.pdf [file ccr-23-0257_supplementary_figure_s1_suppfs1.pdf]

Supplementary Figure 1. Treatment schema.

|                                                   |                                |                                                                                                                                                                                    | Cycle 1 |        |          | Cycle 2 |        |          |
|---------------------------------------------------|--------------------------------|------------------------------------------------------------------------------------------------------------------------------------------------------------------------------------|---------|--------|----------|---------|--------|----------|
|                                                   |                                |                                                                                                                                                                                    | Week 1  | Week 2 | Week 3   | Week 1  | Week 2 | Week 3   |
| Patients with relapsed or refractory solid tumors | Cohort 1a Concomitant Schedule | Irinotecan, IV<br>50 mg/m <sup>2</sup> /day                                                                                                                                        | D1–D5   | –      | Week off | D1–D5   | –      | Week off |
|                                                   |                                | Vincristine, IV<br>1.5 mg/m <sup>2</sup>                                                                                                                                           | D1      | D8     |          | D1      | D8     |          |
|                                                   |                                | REG, PO<br>72 mg/m <sup>2</sup> escalating to 82 mg/m <sup>2</sup> /day<br>(60 mg/m <sup>2</sup> escalating to 65 mg/m <sup>2</sup> /day for patients aged 6 months to <24 months) | D1–D14  |        |          | D1–D14  |        |          |
|                                                   | Cohort 1b Sequential Schedule  | Irinotecan, IV<br>50 mg/m <sup>2</sup> /day                                                                                                                                        | D1–D5   | –      | –        | D1–D5   | –      | –        |
|                                                   |                                | Vincristine, IV<br>1.5 mg/m <sup>2</sup>                                                                                                                                           | D1      | D8     | –        | D1      | D8     | –        |
|                                                   |                                | REG, PO<br>72 mg/m <sup>2</sup> escalating to 82 mg/m <sup>2</sup> /day<br>(60 mg/m <sup>2</sup> escalating to 65 mg/m <sup>2</sup> /day for patients aged 6 months to <24 months) | –       | D8–D21 |          | –       | D8–D21 |          |

D, day; IV, intravenously; PO, orally; REG, regorafenib.
