# Supplementary material for: Regorafenib plus Vincristine and Irinotecan in Pediatric Patients with Recurrent/Refractory Solid Tumors: An Innovative Therapy for Children with Cancer Study
Source: PubMed Central journal article supplement — Clin Cancer Res. 2023 Aug 22;29(21):4341–51. doi: 10.1158/1078-0432.CCR-23-0257 (PMC10618645; doi:10.1158/1078-0432.ccr-23-0257), 2023-08-22
Supplement: ccr-23-0257_supplementary_figure_s2_suppfs2.pdf [file ccr-23-0257_supplementary_figure_s2_suppfs2.pdf]

**Supplementary Figure 2.** Progressive reduction of tumor size in a patient with metastatic alveolar rhabdomyosarcoma treated with regorafenib 82 mg/m<sup>2</sup> plus VI (sequential) following a fourth disseminated relapse.

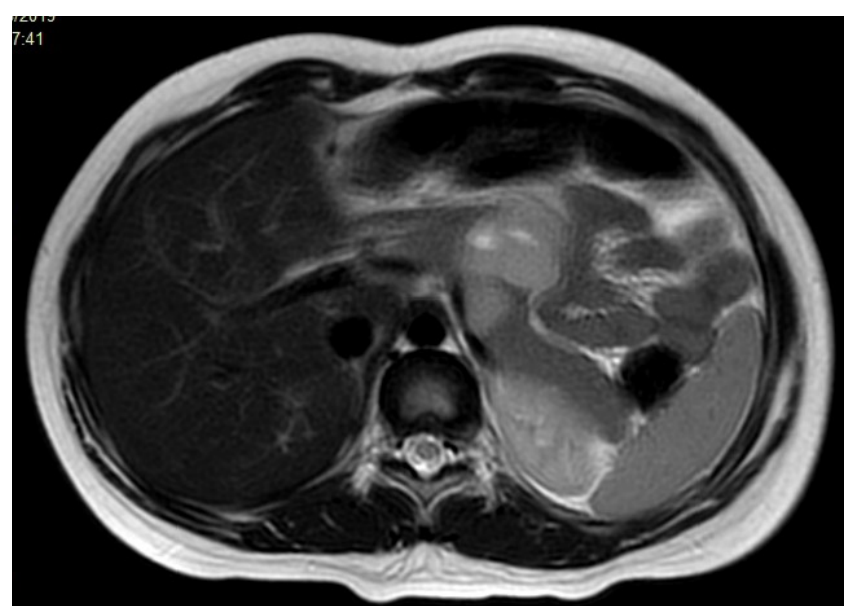

**Baseline (March 2019)**

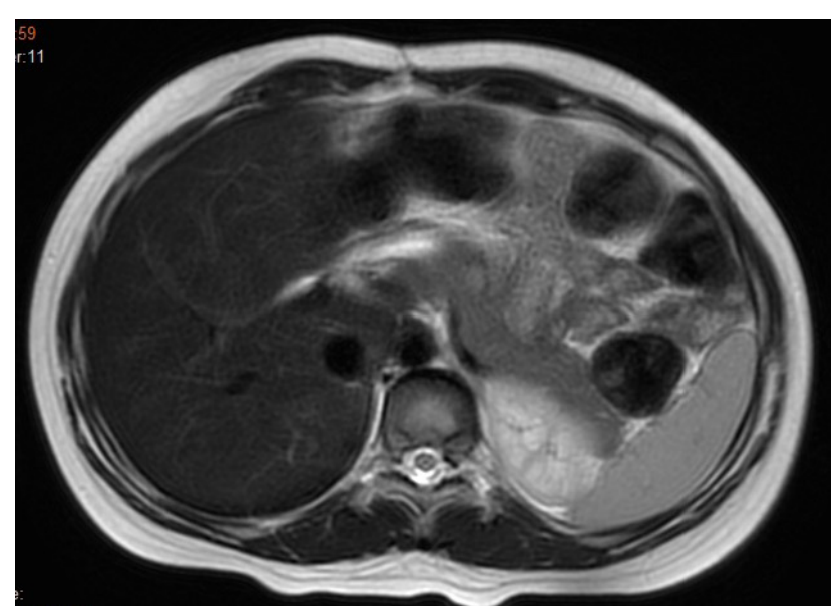

**PR (April 2019)**

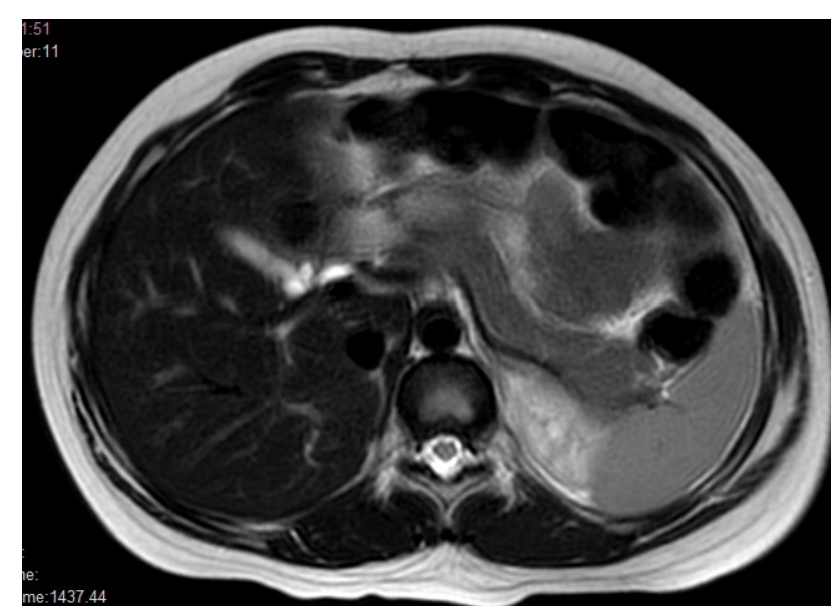

**CR (July 2020)**

CR, complete response; PR, partial response; VI, vincristine and irinotecan.
