# Supplementary material for: Regorafenib plus Vincristine and Irinotecan in Pediatric Patients with Recurrent/Refractory Solid Tumors: An Innovative Therapy for Children with Cancer Study
Source: PubMed Central journal article supplement — Clin Cancer Res. 2023 Aug 22;29(21):4341–51. doi: 10.1158/1078-0432.CCR-23-0257 (PMC10618645; doi:10.1158/1078-0432.ccr-23-0257), 2023-08-22
Supplement: ccr-23-0257_supplementary_table_s1_suppts1.pdf [file ccr-23-0257_supplementary_table_s1_suppts1.pdf]

**Supplementary Table 1. TEAEs (safety analysis set)**

| Event, n (%)                             |         | Regorafenib<br>72 mg/m <sup>2</sup> concomitant<br>with VI<br>(n=2) | Regorafenib<br>72 mg/m <sup>2</sup> sequential<br>with VI<br>(n=6) | Regorafenib<br>82 mg/m <sup>2</sup> sequential<br>with VI<br>(n=13) | Total<br>(N=21) |
|------------------------------------------|---------|---------------------------------------------------------------------|--------------------------------------------------------------------|---------------------------------------------------------------------|-----------------|
| Any TEAE                                 |         | 2 (100)                                                             | 6 (100)                                                            | 13 (100)                                                            | 21 (100)        |
| Treatment-related AEs                    |         |                                                                     |                                                                    |                                                                     |                 |
| Any                                      |         | 2 (100)                                                             | 6 (100)                                                            | 13 (100)                                                            | 21 (100)        |
| Regorafenib                              |         | 2 (100)                                                             | 6 (100)                                                            | 11 (85)                                                             | 19 (91)         |
| Irinotecan                               |         | 2 (100)                                                             | 6 (100)                                                            | 12 (92)                                                             | 20 (95)         |
| Vincristine                              |         | 2 (100)                                                             | 6 (100)                                                            | 9 (69)                                                              | 17 (81)         |
| Worst grade                              | Grade 1 | 0                                                                   | 0                                                                  | 2 (15)                                                              | 2 (10)          |
|                                          | Grade 2 | 0                                                                   | 0                                                                  | 0                                                                   | 0               |
|                                          | Grade 3 | 0                                                                   | 3 (50)                                                             | 8 (62)                                                              | 11 (52)         |
|                                          | Grade 4 | 2 (100)                                                             | 3 (50)                                                             | 3 (23)                                                              | 8 (38)          |
| Leading to dose modification             |         | 2 (100)                                                             | 6 (100)                                                            | 10 (77)                                                             | 18 (86)         |
| Leading to discontinuation of study drug |         |                                                                     |                                                                    |                                                                     |                 |
| Any                                      |         | 1 (50)                                                              | 0                                                                  | 2 (15)                                                              | 3 (14)          |
| Regorafenib                              |         | 0                                                                   | 0                                                                  | 1 (8)                                                               | 1 (5)           |
| Irinotecan                               |         | 0                                                                   | 0                                                                  | 2 (15)                                                              | 2 (10)          |
| Vincristine                              |         | 1 (50)                                                              | 0                                                                  | 1 (8)                                                               | 2 (10)          |
| Any TESAE                                |         | 2 (100)                                                             | 2 (33)                                                             | 4 (31)                                                              | 8 (38)          |

TEAE, treatment-emergent adverse event; TESAE, treatment-emergent serious adverse event; VI, vincristine and irinotecan.
