# Supplementary material for: Regorafenib plus Vincristine and Irinotecan in Pediatric Patients with Recurrent/Refractory Solid Tumors: An Innovative Therapy for Children with Cancer Study
Source: PubMed Central journal article supplement — Clin Cancer Res. 2023 Aug 22;29(21):4341–51. doi: 10.1158/1078-0432.CCR-23-0257 (PMC10618645; doi:10.1158/1078-0432.ccr-23-0257), 2023-08-22
Supplement: ccr-23-0257_supplementary_table_s2_suppts2.pdf [file ccr-23-0257_supplementary_table_s2_suppts2.pdf]

**Supplementary Table 2.** AEs considered potentially related to regorafenib with an incidence  $\geq 10\%$  (safety analysis set)

| Regorafenib-related AE, n (%) | Regorafenib<br>72 mg/m <sup>2</sup><br>concomitant with<br>VI (n=2) |                   | Regorafenib<br>72 mg/m <sup>2</sup><br>sequential with VI<br>(n=6) |                   | Regorafenib<br>82 mg/m <sup>2</sup><br>sequential with VI<br>(n=13) |                   | Total<br>(N=21) |                   |
|-------------------------------|---------------------------------------------------------------------|-------------------|--------------------------------------------------------------------|-------------------|---------------------------------------------------------------------|-------------------|-----------------|-------------------|
|                               | All<br>grades                                                       | Grade<br>$\geq 3$ | All<br>grades                                                      | Grade<br>$\geq 3$ | All<br>grades                                                       | Grade<br>$\geq 3$ | All<br>grades   | Grade<br>$\geq 3$ |
| Neutropenia <sup>a</sup>      | 2 (100)                                                             | 2 (100)           | 3 (50)                                                             | 3 (50)            | 6 (46)                                                              | 5 (38)            | 11 (52)         | 10 (48)           |
| Anemia                        | 2 (100)                                                             | 0                 | 2 (33)                                                             | 1 (17)            | 5 (38)                                                              | 2 (15)            | 9 (43)          | 3 (14)            |
| AST increased                 | 2 (100)                                                             | 2 (100)           | 3 (50)                                                             | 2 (33)            | 4 (31)                                                              | 0                 | 9 (43)          | 4 (19)            |
| ALT increased                 | 2 (100)                                                             | 2 (100)           | 3 (50)                                                             | 2 (33)            | 2 (15)                                                              | 1 (8)             | 7 (33)          | 5 (24)            |
| Thrombocytopenia <sup>b</sup> | 1 (50)                                                              | 1 (50)            | 2 (33)                                                             | 0                 | 4 (31)                                                              | 3 (23)            | 7 (33)          | 4 (19)            |
| Decreased appetite            | 1 (50)                                                              | 1 (50)            | 2 (33)                                                             | 0                 | 3 (23)                                                              | 1 (8)             | 6 (29)          | 2 (10)            |
| Weight decreased              | 1 (50)                                                              | 0                 | 1 (17)                                                             | 0                 | 4 (31)                                                              | 0                 | 6 (29)          | 0                 |
| Fatigue                       | 1 (50)                                                              | 0                 | 2 (33)                                                             | 0                 | 2 (15)                                                              | 0                 | 5 (24)          | 0                 |
| Leukopenia <sup>c</sup>       | 1 (50)                                                              | 1 (50)            | 1 (17)                                                             | 1 (17)            | 3 (23)                                                              | 0                 | 5 (24)          | 2 (10)            |
| Diarrhea                      | 2 (100)                                                             | 0                 | 0                                                                  | 0                 | 2 (15)                                                              | 0                 | 4 (19)          | 0                 |
| TSH increased                 | 0                                                                   | 0                 | 2 (33)                                                             | 0                 | 2 (15)                                                              | 0                 | 4 (19)          | 0                 |
| GGT increased                 | 1 (50)                                                              | 0                 | 1 (17)                                                             | 1 (17)            | 2 (15)                                                              | 0                 | 4 (19)          | 1 (5)             |
| Abdominal pain                | 1 (50)                                                              | 1 (50)            | 0                                                                  | 0                 | 2 (15)                                                              | 0                 | 3 (14)          | 1 (5)             |
| Blood bilirubin increased     | 1 (50)                                                              | 0                 | 1 (17)                                                             | 0                 | 1 (8)                                                               | 0                 | 3 (14)          | 0                 |
| Dry skin                      | 0                                                                   | 0                 | 2 (33)                                                             | 0                 | 1 (8)                                                               | 0                 | 3 (14)          | 0                 |
| Nausea                        | 0                                                                   | 0                 | 2 (33)                                                             | 1 (17)            | 1 (8)                                                               | 0                 | 3 (14)          | 1 (5)             |
| Proteinuria                   | 1 (50)                                                              | 0                 | 2 (33)                                                             | 0                 | 0                                                                   | 0                 | 3 (14)          | 0                 |
| HFSR                          | 0                                                                   | 0                 | 3 (50)                                                             | 1 (17)            | 0                                                                   | 0                 | 3 (14)          | 1 (5)             |
| Rash                          | 1 (50)                                                              | 0                 | 1 (17)                                                             | 0                 | 1 (8)                                                               | 0                 | 3 (14)          | 0                 |
| Rash maculopapular            | 0                                                                   | 0                 | 1 (17)                                                             | 1 (17)            | 2 (15)                                                              | 0                 | 3 (14)          | 1 (5)             |
| Vomiting                      | 1 (50)                                                              | 1 (50)            | 1 (17)                                                             | 0                 | 1(8)                                                                | 0                 | 3 (14)          | 1 (5)             |
| Alopecia                      | 0                                                                   | 0                 | 1 (17)                                                             | 0                 | 1 (8)                                                               | 0                 | 2 (10)          | 0                 |
| Erythema                      | 0                                                                   | 0                 | 0                                                                  | 0                 | 2 (15)                                                              | 0                 | 2 (10)          | 0                 |
| Headache                      | 1 (50)                                                              | 0                 | 0                                                                  | 0                 | 1 (8)                                                               | 0                 | 2 (10)          | 0                 |

|                                  |        |   |        |   |        |   |        |   |
|----------------------------------|--------|---|--------|---|--------|---|--------|---|
| Hypertension                     | 0      | 0 | 1 (17) | 0 | 1 (8)  | 0 | 2 (10) | 0 |
| Hypothyroidism                   | 0      | 0 | 0      | 0 | 2 (15) | 0 | 2 (10) | 0 |
| Lymphopenia <sup>d</sup>         | 1 (50) | 0 | 1 (17) | 0 | 0      | 0 | 2 (10) | 0 |
| Myalgia                          | 0      | 0 | 1 (17) | 0 | 1 (8)  | 0 | 2 (10) | 0 |
| Prothrombin time ratio increased | 0      | 0 | 2 (33) | 0 | 0      | 0 | 2 (10) | 0 |
| Stomatitis                       | 0      | 0 | 1 (17) | 0 | 1 (8)  | 0 | 2 (10) | 0 |

AE, adverse event; ALT, alanine aminotransferase; AST, aspartate aminotransferase; GGT, gamma-glutamyl transferase; HFSR, hand-foot skin reaction; TSH, thyroid stimulating hormone; VI, vincristine and irinotecan; WBC, white blood cell.

Or <sup>a</sup>neutrophil count decreased; <sup>b</sup>platelet count decreased; <sup>c</sup>WBC count decreased; <sup>d</sup> lymphocyte count decreased.
