# Supplementary material for: Regorafenib plus Vincristine and Irinotecan in Pediatric Patients with Recurrent/Refractory Solid Tumors: An Innovative Therapy for Children with Cancer Study
Source: PubMed Central journal article supplement — Clin Cancer Res. 2023 Aug 22;29(21):4341–51. doi: 10.1158/1078-0432.CCR-23-0257 (PMC10618645; doi:10.1158/1078-0432.ccr-23-0257), 2023-08-22
Supplement: ccr-23-0257_supplementary_table_s3_suppts3.pdf [file ccr-23-0257_supplementary_table_s3_suppts3.pdf]

**Supplementary Table 3.** AEs considered potentially related to VI with an incidence  $\geq 10\%$  (safety analysis set)

| Drug-related AE, n (%)        | Regorafenib<br>72 mg/m <sup>2</sup><br>concomitant with VI<br>(n=2) |                | Regorafenib<br>72 mg/m <sup>2</sup><br>sequential with VI<br>(n=6) |                | Regorafenib<br>82 mg/m <sup>2</sup><br>sequential with VI<br>(n=13) |                | Total (N=21)  |                   |
|-------------------------------|---------------------------------------------------------------------|----------------|--------------------------------------------------------------------|----------------|---------------------------------------------------------------------|----------------|---------------|-------------------|
|                               | All<br>grades                                                       | Grade $\geq 3$ | All<br>grades                                                      | Grade $\geq 3$ | All<br>grades                                                       | Grade $\geq 3$ | All<br>grades | Grade<br>$\geq 3$ |
| <b>Irinotecan-related AE</b>  |                                                                     |                |                                                                    |                |                                                                     |                |               |                   |
| Diarrhea                      | 1 (50)                                                              | 0              | 4 (67)                                                             | 1 (17)         | 10 (77)                                                             | 3 (23)         | 15 (71)       | 4 (19)            |
| Neutropenia <sup>a</sup>      | 2 (100)                                                             | 2 (100)        | 6 (100)                                                            | 6 (100)        | 7 (54)                                                              | 7 (54)         | 15 (71)       | 15 (71)           |
| Anemia                        | 1 (50)                                                              | 0              | 3 (50)                                                             | 1 (17)         | 9 (69)                                                              | 5 (39)         | 13 (62)       | 6 (29)            |
| Thrombocytopenia <sup>b</sup> | 1 (50)                                                              | 1 (50)         | 4 (67)                                                             | 2 (33)         | 6 (46)                                                              | 4 (31)         | 11 (52)       | 7 (33)            |
| Vomiting                      | 1 (50)                                                              | 1 (50)         | 2 (33)                                                             | 0              | 8 (62)                                                              | 2 (15)         | 11 (52)       | 3 (14)            |
| Decreased appetite            | 2 (100)                                                             | 1 (50)         | 4 (67)                                                             | 0              | 4 (31)                                                              | 1 (8)          | 10 (48)       | 2 (10)            |
| Abdominal pain                | 1 (50)                                                              | 1 (50)         | 2 (33)                                                             | 0              | 5 (39)                                                              | 1 (8)          | 8 (38)        | 2 (10)            |
| Leukopenia <sup>c</sup>       | 1 (50)                                                              | 1 (50)         | 3 (50)                                                             | 3 (50)         | 4 (31)                                                              | 2 (15)         | 8 (38)        | 6 (29)            |
| Nausea                        | 0                                                                   | 0              | 3 (50)                                                             | 1 (17)         | 5 (39)                                                              | 0              | 8 (38)        | 1 (5)             |
| AST increased                 | 1 (50)                                                              | 1 (50)         | 2 (33)                                                             | 0              | 4 (31)                                                              | 0              | 7 (33)        | 1 (5)             |
| ALT increased                 | 1 (50)                                                              | 1 (50)         | 1 (17)                                                             | 0              | 4 (31)                                                              | 0              | 6 (29)        | 1 (5)             |
| Alopecia                      | 0                                                                   | 0              | 2 (33)                                                             | 0              | 3 (23)                                                              | 0              | 5 (24)        | 0                 |
| Weight decreased              | 1 (50)                                                              | 0              | 1 (17)                                                             | 0              | 3 (23)                                                              | 0              | 5 (24)        | 0                 |
| Fatigue                       | 1 (50)                                                              | 0              | 2 (33)                                                             | 0              | 1 (8)                                                               | 0              | 4 (19)        | 0                 |
| Lethargy                      | 0                                                                   | 0              | 2 (33)                                                             | 0              | 2 (15)                                                              | 0              | 4 (19)        | 0                 |
| Asthenia                      | 0                                                                   | 0              | 1 (17)                                                             | 0              | 2 (15)                                                              | 1 (8)          | 3 (14)        | 1 (5)             |
| Lymphopenia <sup>d</sup>      | 1 (50)                                                              | 0              | 1 (17)                                                             | 0              | 1 (8)                                                               | 1 (8)          | 3 (14)        | 1 (5)             |
| Headache                      | 1 (50)                                                              | 0              | 1 (17)                                                             | 0              | 0                                                                   | 0              | 2 (10)        | 0                 |
| Hypokalemia                   | 1 (50)                                                              | 0              | 0                                                                  | 0              | 1 (8)                                                               | 1 (8)          | 2 (10)        | 1 (5)             |
| Oral pain                     | 0                                                                   | 0              | 1 (17)                                                             | 0              | 1 (8)                                                               | 0              | 2 (10)        | 0                 |
| Pyrexia                       | 1 (50)                                                              | 0              | 0                                                                  | 0              | 1 (8)                                                               | 0              | 2 (10)        | 0                 |
| Skin hyperpigmentation        | 0                                                                   | 0              | 2 (33)                                                             | 0              | 0                                                                   | 0              | 2 (10)        | 0                 |
| <b>Vincristine-related AE</b> |                                                                     |                |                                                                    |                |                                                                     |                |               |                   |
| Neutropenia <sup>a</sup>      | 2 (100)                                                             | 1 (50)         | 5 (83)                                                             | 5 (83)         | 4 (31)                                                              | 4 (31)         | 11 (52)       | 10 (48)           |

|                               |        |        |        |        |        |        |        |        |
|-------------------------------|--------|--------|--------|--------|--------|--------|--------|--------|
| Anemia                        | 0      | 0      | 1 (17) | 0      | 7 (54) | 5 (39) | 8 (38) | 5 (24) |
| Leukopenia <sup>c</sup>       | 1 (50) | 0      | 3 (50) | 3 (50) | 4 (31) | 2 (15) | 8 (38) | 5 (24) |
| Abdominal pain                | 1 (50) | 1 (50) | 1 (17) | 0      | 5 (39) | 1 (8)  | 7 (33) | 2 (10) |
| Nausea                        | 0      | 0      | 3 (50) | 1 (17) | 4 (31) | 0      | 7 (33) | 1 (5)  |
| Vomiting                      | 1 (50) | 1 (50) | 2 (33) | 0      | 4 (31) | 0      | 7 (33) | 1 (5)  |
| Decreased appetite            | 1 (50) | 1 (50) | 3 (50) | 0      | 2 (15) | 0      | 6 (29) | 1 (5)  |
| Thrombocytopenia <sup>b</sup> | 1 (50) | 1 (50) | 2 (33) | 1 (17) | 2 (15) | 1 (8)  | 5 (24) | 3 (14) |
| AST increased                 | 1 (50) | 1 (50) | 0      | 0      | 3 (23) | 0      | 4 (19) | 1 (5)  |
| ALT increased                 | 1 (50) | 1 (50) | 1 (17) | 0      | 2 (15) | 0      | 4 (19) | 1 (5)  |
| Alopecia                      | 0      | 0      | 2 (33) | 0      | 2 (15) | 0      | 4 (19) | 0      |
| Fatigue                       | 1 (50) | 0      | 2 (33) | 0      | 1 (8)  | 0      | 4 (19) | 0      |
| Lethargy                      | 0      | 0      | 2 (33) | 0      | 2 (15) | 0      | 4 (19) | 0      |
| Constipation                  | 1 (50) | 0      | 1 (17) | 0      | 1 (8)  | 0      | 3 (14) | 0      |
| Diarrhea                      | 0      | 0      | 0      | 0      | 3 (21) | 0      | 3 (14) | 0      |
| GGT increased                 | 1 (50) | 1 (50) | 0      | 0      | 2 (15) | 0      | 3 (14) | 1 (5)  |
| Pain in jaw                   | 1 (5)  | 0      | 1 (17) | 0      | 1 (8)  | 0      | 3 (14) | 0      |
| Toothache                     | 0      | 0      | 2 (33) | 0      | 1 (8)  | 0      | 3 (14) | 0      |
| Blood bilirubin increased     | 1 (50) | 0      | 0      | 0      | 1 (8)  | 0      | 2 (10) | 0      |
| Myalgia                       | 0      | 0      | 1 (17) | 0      | 1 (8)  | 0      | 2 (10) | 0      |
| Headache                      | 0      | 0      | 1 (17) | 0      | 1 (8)  | 0      | 2 (10) | 0      |
| Oral pain                     | 0      | 0      | 1 (16) | 0      | 1 (8)  | 0      | 2 (10) | 0      |
| Pain in extremity             | 0      | 0      | 2 (33) | 0      | 0      | 0      | 2 (10) | 0      |
| Peripheral sensory neuropathy | 1 (50) | 1 (50) | 1 (17) | 0      | 0      | 0      | 2 (10) | 1 (5)  |
| Skin hyperpigmentation        | 0      | 0      | 2 (33) | 0      | 0      | 0      | 2 (10) | 0      |
| Weight decreased              | 0      | 0      | 1 (17) | 0      | 1 (8)  | 0      | 2 (10) | 0      |

AE, adverse event; ALT, alanine aminotransferase; AST, aspartate aminotransferase; GGT, gamma-glutamyl transferase; VI, vincristine and irinotecan; WBC, white blood cell.

<sup>a</sup>Or neutrophil count decreased. <sup>b</sup>Or platelet count decreased. <sup>c</sup>Or WBC count decreased. <sup>d</sup>Or lymphocyte count decreased.
