# Supplementary material for: Regorafenib plus Vincristine and Irinotecan in Pediatric Patients with Recurrent/Refractory Solid Tumors: An Innovative Therapy for Children with Cancer Study
Source: PubMed Central journal article supplement — Clin Cancer Res. 2023 Aug 22;29(21):4341–51. doi: 10.1158/1078-0432.CCR-23-0257 (PMC10618645; doi:10.1158/1078-0432.ccr-23-0257), 2023-08-22
Supplement: ccr-23-0257_supplementary_table_s4_suppts4.pdf [file ccr-23-0257_supplementary_table_s4_suppts4.pdf]

**Supplementary Table 4. Dose-limiting toxicities**

| Cohort, n                                                  | Patients evaluable for DLT | Patients with a DLT | DLT events (all grade 3)                                                                     |
|------------------------------------------------------------|----------------------------|---------------------|----------------------------------------------------------------------------------------------|
| Regorafenib 72 mg/m <sup>2</sup> concomitant with VI (n=2) | 2                          | 2                   | Peripheral sensory neuropathy; hepatic pain; ALT increased; AST increased; DILI <sup>a</sup> |
|                                                            |                            |                     | Abdominal pain; vomiting; febrile bone marrow aplasia <sup>b</sup>                           |
| Regorafenib 72 mg/m <sup>2</sup> sequential with VI (n=6)  | 6                          | 1                   | Maculopapular rash; AST increased                                                            |
| Regorafenib 82 mg/m <sup>2</sup> sequential with VI (n=13) | 12 <sup>c</sup>            | 1                   | Thrombocytopenia > 7days                                                                     |

ALT, alanine aminotransferase; AST, aspartate aminotransferase; DILI, drug-induced liver injury; DLT, dose-limiting toxicity; VI, vincristine and irinotecan.

<sup>a</sup>Hepatic pain, drug-induced liver injury, and peripheral sensory neuropathy occurred on day 3 of concomitant treatment, and elevated ALT and AST occurred on day 4 of treatment. Irinotecan was interrupted on day 5 (the fifth dose of five daily doses was omitted); regorafenib was interrupted on day 4, and both drug doses were reduced at the next cycle. Vincristine was discontinued due to neuropathy.

<sup>b</sup>Vomiting started on day 8 of concomitant treatment, whereas abdominal pain and febrile bone marrow aplasia occurred on day 10. Regorafenib was interrupted on day 10, whereas irinotecan and vincristine had already been given for cycle 1 and the DLTs delayed cycle 2 by 1 week.

<sup>c</sup>One patient received <80% of the planned dose of regorafenib during cycle 1, and so was not evaluable for DLT.
